# Supplementary material
Source: publisher figshare collection journal article supplement (https://gsajournals.figshare.com/ndownloader/files/17284199)
Supplement: Supplementary file 1 [file 17284199]

## Sheet: Table S6 Functional annotation 
Supplemental Material, Table S6. Functional annotation clustering of autosomal downregulated genes in Smchd1-null mouse NPCs
Annotation Cluster 1	Enrichment Score: 2.3727915102611283
Category	Term	Count	%	PValue	Genes	List Total	Pop Hits	Pop Total	Fold Enrichment	Bonferroni	Benjamini	FDR
GOTERM_CC_DIRECT	GO:0005614~interstitial matrix	3	4.10959	0.0013322	ENSMUSG00000028364, ENSMUSG00000043631, ENSMUSG00000024076	64	17	19662	54.2151	0.144416	0.144416	1.51174
GOTERM_CC_DIRECT	GO:0005578~proteinaceous extracellular matrix	6	8.21918	0.00340979	ENSMUSG00000028364, ENSMUSG00000059901, ENSMUSG00000043631, ENSMUSG00000024076, ENSMUSG00000036856, ENSMUSG00000060572	64	316	19662	5.83327	0.32943	0.124718	3.82773
UP_KEYWORDS	Extracellular matrix	5	6.84932	0.00573867	ENSMUSG00000028364, ENSMUSG00000043631, ENSMUSG00000024076, ENSMUSG00000036856, ENSMUSG00000060572	70	235	22680	6.89362	0.548065	0.180085	6.54912
UP_KEYWORDS	Secreted	12	16.4384	0.0123801	ENSMUSG00000052353, ENSMUSG00000024486, ENSMUSG00000028364, ENSMUSG00000022454, ENSMUSG00000026958, ENSMUSG00000043631, ENSMUSG00000031778, ENSMUSG00000024076, ENSMUSG00000036856, ENSMUSG00000002985, ENSMUSG00000000489, ENSMUSG00000060572	70	1685	22680	2.30742	0.820776	0.290947	13.6373
Annotation Cluster 2	Enrichment Score: 2.364072937823593
Category	Term	Count	%	PValue	Genes	List Total	Pop Hits	Pop Total	Fold Enrichment	Bonferroni	Benjamini	FDR
UP_KEYWORDS	Glycoprotein	25	34.2466	0.000230507	ENSMUSG00000003934, ENSMUSG00000059588, ENSMUSG00000028364, ENSMUSG00000022454, ENSMUSG00000044288, ENSMUSG00000029189, ENSMUSG00000028047, ENSMUSG00000043631, ENSMUSG00000023143, ENSMUSG00000089774, ENSMUSG00000050164, ENSMUSG00000024076, ENSMUSG00000051022, ENSMUSG00000002985, ENSMUSG00000000489, ENSMUSG00000060572, ENSMUSG00000050896, ENSMUSG00000051067, ENSMUSG00000052353, ENSMUSG00000016028,…	70	3815	22680	2.1232	0.031313	0.015781	0.270953
UP_KEYWORDS	Disulfide bond	20	27.3973	0.00196285	ENSMUSG00000003934, ENSMUSG00000059588, ENSMUSG00000028364, ENSMUSG00000022454, ENSMUSG00000028047, ENSMUSG00000059901, ENSMUSG00000023143, ENSMUSG00000024076, ENSMUSG00000051022, ENSMUSG00000000489, ENSMUSG00000060572, ENSMUSG00000051067, ENSMUSG00000016028, ENSMUSG00000024486, ENSMUSG00000027849, ENSMUSG00000031778, ENSMUSG00000036856, ENSMUSG00000024109, ENSMUSG00000074939, ENSMUSG00000019970	70	3124	22680	2.07426	0.23749	0.086416	2.28586
UP_SEQ_FEATURE	signal peptide	21	28.7671	0.00248818	ENSMUSG00000003934, ENSMUSG00000059588, ENSMUSG00000028364, ENSMUSG00000022454, ENSMUSG00000028047, ENSMUSG00000043631, ENSMUSG00000023143, ENSMUSG00000024076, ENSMUSG00000051022, ENSMUSG00000002985, ENSMUSG00000000489, ENSMUSG00000060572, ENSMUSG00000050896, ENSMUSG00000051067, ENSMUSG00000052353, ENSMUSG00000016028, ENSMUSG00000024486, ENSMUSG00000026958, ENSMUSG00000031778, ENSMUSG00000036856,…	62	3124	18012	1.95289	0.549415	0.549415	3.30597
GOTERM_CC_DIRECT	GO:0005576~extracellular region	14	19.1781	0.00327287	ENSMUSG00000022454, ENSMUSG00000028364, ENSMUSG00000059901, ENSMUSG00000028047, ENSMUSG00000043631, ENSMUSG00000024076, ENSMUSG00000002985, ENSMUSG00000000489, ENSMUSG00000060572, ENSMUSG00000052353, ENSMUSG00000024486, ENSMUSG00000026958, ENSMUSG00000031778, ENSMUSG00000036856	64	1753	19662	2.45354	0.318565	0.174509	3.67665
UP_SEQ_FEATURE	glycosylation site:N-linked (GlcNAc...)	22	30.137	0.00518429	ENSMUSG00000003934, ENSMUSG00000059588, ENSMUSG00000028364, ENSMUSG00000022454, ENSMUSG00000044288, ENSMUSG00000029189, ENSMUSG00000028047, ENSMUSG00000043631, ENSMUSG00000023143, ENSMUSG00000089774, ENSMUSG00000050164, ENSMUSG00000024076, ENSMUSG00000051022, ENSMUSG00000000489, ENSMUSG00000050896, ENSMUSG00000051067, ENSMUSG00000052353, ENSMUSG00000016028, ENSMUSG00000026958, ENSMUSG00000036856,…	62	3563	18012	1.79381	0.810485	0.564667	6.77379
UP_KEYWORDS	Secreted	12	16.4384	0.0123801	ENSMUSG00000052353, ENSMUSG00000024486, ENSMUSG00000028364, ENSMUSG00000022454, ENSMUSG00000026958, ENSMUSG00000043631, ENSMUSG00000031778, ENSMUSG00000024076, ENSMUSG00000036856, ENSMUSG00000002985, ENSMUSG00000000489, ENSMUSG00000060572	70	1685	22680	2.30742	0.820776	0.290947	13.6373
UP_KEYWORDS	Signal	23	31.5068	0.013474	ENSMUSG00000003934, ENSMUSG00000059588, ENSMUSG00000028364, ENSMUSG00000022454, ENSMUSG00000028047, ENSMUSG00000059901, ENSMUSG00000043631, ENSMUSG00000023143, ENSMUSG00000024076, ENSMUSG00000051022, ENSMUSG00000002985, ENSMUSG00000000489, ENSMUSG00000060572, ENSMUSG00000050896, ENSMUSG00000051067, ENSMUSG00000052353, ENSMUSG00000016028, ENSMUSG00000024486, ENSMUSG00000026958, ENSMUSG00000031778,…	70	4543	22680	1.64033	0.846192	0.268025	14.7563
UP_SEQ_FEATURE	disulfide bond	15	20.5479	0.0383816	ENSMUSG00000003934, ENSMUSG00000022454, ENSMUSG00000028364, ENSMUSG00000028047, ENSMUSG00000023143, ENSMUSG00000024076, ENSMUSG00000051022, ENSMUSG00000000489, ENSMUSG00000060572, ENSMUSG00000051067, ENSMUSG00000016028, ENSMUSG00000024486, ENSMUSG00000031778, ENSMUSG00000024109, ENSMUSG00000074939	62	2510	18012	1.73615	0.999996	0.832897	41.0299
Annotation Cluster 3	Enrichment Score: 2.216593951869173
Category	Term	Count	%	PValue	Genes	List Total	Pop Hits	Pop Total	Fold Enrichment	Bonferroni	Benjamini	FDR
GOTERM_BP_DIRECT	GO:0048661~positive regulation of smooth muscle cell proliferation	5	6.84932	0.00012569	ENSMUSG00000059588, ENSMUSG00000024486, ENSMUSG00000028341, ENSMUSG00000031778, ENSMUSG00000000489	59	80	18082	19.1547	0.0755543	0.0755543	0.186509
GOTERM_CC_DIRECT	GO:0009986~cell surface	7	9.58904	0.0152057	ENSMUSG00000050896, ENSMUSG00000024486, ENSMUSG00000031778, ENSMUSG00000036856, ENSMUSG00000024109, ENSMUSG00000002985, ENSMUSG00000000489	64	629	19662	3.41897	0.833495	0.361212	16.0614
GOTERM_BP_DIRECT	GO:0060326~cell chemotaxis	3	4.10959	0.0259854	ENSMUSG00000024486, ENSMUSG00000031778, ENSMUSG00000000489	59	78	18082	11.7875	1	0.935598	32.3641
GOTERM_BP_DIRECT	GO:0030335~positive regulation of cell migration	4	5.47945	0.0273898	ENSMUSG00000052353, ENSMUSG00000024486, ENSMUSG00000031778, ENSMUSG00000000489	59	203	18082	6.03891	1	0.916226	33.7981
Annotation Cluster 4	Enrichment Score: 1.9704447909911882
Category	Term	Count	%	PValue	Genes	List Total	Pop Hits	Pop Total	Fold Enrichment	Bonferroni	Benjamini	FDR
UP_KEYWORDS	EGF-like domain	7	9.58904	6.19313e-05	ENSMUSG00000016028, ENSMUSG00000024486, ENSMUSG00000028364, ENSMUSG00000022454, ENSMUSG00000028047, ENSMUSG00000023143, ENSMUSG00000024109	70	224	22680	10.125	0.00851037	0.00851037	0.0728641
INTERPRO	IPR013032:EGF-like, conserved site	6	8.21918	0.000394869	ENSMUSG00000016028, ENSMUSG00000024486, ENSMUSG00000028364, ENSMUSG00000022454, ENSMUSG00000028047, ENSMUSG00000023143	66	197	20594	9.50346	0.0763151	0.0763151	0.494204
INTERPRO	IPR001791:Laminin G domain	4	5.47945	0.000818047	ENSMUSG00000016028, ENSMUSG00000022454, ENSMUSG00000028047, ENSMUSG00000024109	66	58	20594	21.5193	0.151678	0.0789559	1.02134
INTERPRO	IPR000742:Epidermal growth factor-like domain	6	8.21918	0.000911367	ENSMUSG00000016028, ENSMUSG00000024486, ENSMUSG00000028364, ENSMUSG00000022454, ENSMUSG00000028047, ENSMUSG00000024109	66	237	20594	7.8995	0.167455	0.0592609	1.13724
GOTERM_MF_DIRECT	GO:0008201~heparin binding	5	6.84932	0.00159182	ENSMUSG00000024486, ENSMUSG00000022454, ENSMUSG00000028047, ENSMUSG00000043631, ENSMUSG00000002985	59	151	17446	9.79122	0.245709	0.245709	1.93776
SMART	SM00181:EGF	5	6.84932	0.00812795	ENSMUSG00000016028, ENSMUSG00000028364, ENSMUSG00000022454, ENSMUSG00000028047, ENSMUSG00000024109	47	181	10425	6.12731	0.397093	0.397093	7.90582
UP_SEQ_FEATURE	domain:EGF-like 2; calcium-binding	3	4.10959	0.0134191	ENSMUSG00000016028, ENSMUSG00000022454, ENSMUSG00000028047	62	52	18012	16.7605	0.986742	0.763322	16.6656
SMART	SM00282:LamG	3	4.10959	0.0140023	ENSMUSG00000016028, ENSMUSG00000022454, ENSMUSG00000024109	47	41	10425	16.2299	0.582836	0.354118	13.2641
UP_SEQ_FEATURE	domain:EGF-like 4	3	4.10959	0.0149311	ENSMUSG00000028364, ENSMUSG00000022454, ENSMUSG00000028047	62	55	18012	15.8463	0.991884	0.699856	18.3727
GOTERM_BP_DIRECT	GO:0007155~cell adhesion	6	8.21918	0.0194362	ENSMUSG00000022091, ENSMUSG00000016028, ENSMUSG00000028364, ENSMUSG00000028047, ENSMUSG00000031778, ENSMUSG00000024109	59	485	18082	3.79144	0.999995	0.914003	25.286
UP_SEQ_FEATURE	domain:EGF-like 3	3	4.10959	0.0210616	ENSMUSG00000028364, ENSMUSG00000022454, ENSMUSG00000024109	62	66	18012	13.2053	0.998899	0.678668	24.9676
GOTERM_MF_DIRECT	GO:0048306~calcium-dependent protein binding	3	4.10959	0.0221001	ENSMUSG00000027849, ENSMUSG00000044080, ENSMUSG00000024109	59	69	17446	12.8563	0.980853	0.861626	24.0046
INTERPRO	IPR013320:Concanavalin A-like lectin/glucanase, subgroup	4	5.47945	0.0291116	ENSMUSG00000016028, ENSMUSG00000022454, ENSMUSG00000028047, ENSMUSG00000024109	66	211	20594	5.91527	0.997363	0.57187	30.9682
INTERPRO	IPR000152:EGF-type aspartate/asparagine hydroxylation site	3	4.10959	0.0384045	ENSMUSG00000016028, ENSMUSG00000022454, ENSMUSG00000024109	66	98	20594	9.55195	0.999619	0.626161	38.8138
UP_KEYWORDS	Calcium	7	9.58904	0.0397376	ENSMUSG00000016028, ENSMUSG00000022454, ENSMUSG00000028047, ENSMUSG00000027849, ENSMUSG00000044080, ENSMUSG00000037681, ENSMUSG00000024109	70	827	22680	2.74244	0.996286	0.372687	37.9498
UP_KEYWORDS	Cell adhesion	5	6.84932	0.051206	ENSMUSG00000022091, ENSMUSG00000028364, ENSMUSG00000028047, ENSMUSG00000031778, ENSMUSG00000024109	70	459	22680	3.52941	0.999293	0.404365	46.132
UP_SEQ_FEATURE	domain:EGF-like 1	3	4.10959	0.0544378	ENSMUSG00000022454, ENSMUSG00000028047, ENSMUSG00000024109	62	111	18012	7.85179	1	0.833243	53.0159
INTERPRO	IPR001881:EGF-like calcium-binding	3	4.10959	0.0601804	ENSMUSG00000016028, ENSMUSG00000022454, ENSMUSG00000028047	66	126	20594	7.42929	0.999996	0.712793	54.0945
GOTERM_MF_DIRECT	GO:0005509~calcium ion binding	6	8.21918	0.0821254	ENSMUSG00000016028, ENSMUSG00000022454, ENSMUSG00000028047, ENSMUSG00000027849, ENSMUSG00000044080, ENSMUSG00000024109	59	699	17446	2.53815	1	0.885462	65.0963
SMART	SM00179:EGF_CA	3	4.10959	0.106434	ENSMUSG00000016028, ENSMUSG00000022454, ENSMUSG00000028047	47	126	10425	5.28116	0.999067	0.752276	67.8788
Annotation Cluster 5	Enrichment Score: 1.8067905071217383
Category	Term	Count	%	PValue	Genes	List Total	Pop Hits	Pop Total	Fold Enrichment	Bonferroni	Benjamini	FDR
INTERPRO	IPR000008:C2 calcium-dependent membrane targeting	4	5.47945	0.0132195	ENSMUSG00000027849, ENSMUSG00000037681, ENSMUSG00000067629, ENSMUSG00000034796	66	156	20594	8.00078	0.931083	0.359693	15.3745
UP_SEQ_FEATURE	domain:C2 2	3	4.10959	0.015978	ENSMUSG00000027849, ENSMUSG00000037681, ENSMUSG00000034796	62	57	18012	15.2903	0.994225	0.643296	19.5356
UP_SEQ_FEATURE	domain:C2 1	3	4.10959	0.015978	ENSMUSG00000027849, ENSMUSG00000037681, ENSMUSG00000034796	62	57	18012	15.2903	0.994225	0.643296	19.5356
SMART	SM00239:C2	4	5.47945	0.0175622	ENSMUSG00000027849, ENSMUSG00000037681, ENSMUSG00000067629, ENSMUSG00000034796	47	125	10425	7.09787	0.666639	0.306619	16.373
Annotation Cluster 6	Enrichment Score: 1.7776431597645772
Category	Term	Count	%	PValue	Genes	List Total	Pop Hits	Pop Total	Fold Enrichment	Bonferroni	Benjamini	FDR
INTERPRO	IPR011993:Pleckstrin homology-like domain	6	8.21918	0.00939286	ENSMUSG00000054520, ENSMUSG00000037999, ENSMUSG00000024376, ENSMUSG00000067629, ENSMUSG00000025422, ENSMUSG00000074277	66	409	20594	4.57746	0.849965	0.377631	11.1644
INTERPRO	IPR001849:Pleckstrin homology domain	5	6.84932	0.0094476	ENSMUSG00000054520, ENSMUSG00000037999, ENSMUSG00000067629, ENSMUSG00000025422, ENSMUSG00000074277	66	262	20594	5.95478	0.851622	0.317231	11.226
UP_KEYWORDS	GTPase activation	4	5.47945	0.0135049	ENSMUSG00000037999, ENSMUSG00000067629, ENSMUSG00000025422, ENSMUSG00000026527	70	163	22680	7.95092	0.846855	0.235133	14.7878
SMART	SM00233:PH	5	6.84932	0.0249127	ENSMUSG00000054520, ENSMUSG00000037999, ENSMUSG00000067629, ENSMUSG00000025422, ENSMUSG00000074277	47	253	10425	4.38357	0.790734	0.323645	22.4766
GOTERM_MF_DIRECT	GO:0005096~GTPase activator activity	4	5.47945	0.0433265	ENSMUSG00000037999, ENSMUSG00000067629, ENSMUSG00000025422, ENSMUSG00000026527	59	235	17446	5.0331	0.999606	0.926707	41.9606
Annotation Cluster 7	Enrichment Score: 1.2829003545058992
Category	Term	Count	%	PValue	Genes	List Total	Pop Hits	Pop Total	Fold Enrichment	Bonferroni	Benjamini	FDR
GOTERM_CC_DIRECT	GO:0009986~cell surface	7	9.58904	0.0152057	ENSMUSG00000050896, ENSMUSG00000024486, ENSMUSG00000031778, ENSMUSG00000036856, ENSMUSG00000024109, ENSMUSG00000002985, ENSMUSG00000000489	64	629	19662	3.41897	0.833495	0.361212	16.0614
GOTERM_BP_DIRECT	GO:0030336~negative regulation of cell migration	3	4.10959	0.0454997	ENSMUSG00000031778, ENSMUSG00000036856, ENSMUSG00000000489	59	106	18082	8.67381	1	0.960594	49.9229
GOTERM_CC_DIRECT	GO:0005615~extracellular space	8	10.9589	0.204778	ENSMUSG00000024486, ENSMUSG00000028364, ENSMUSG00000022454, ENSMUSG00000043631, ENSMUSG00000031778, ENSMUSG00000036856, ENSMUSG00000002985, ENSMUSG00000000489	64	1504	19662	1.63414	1	0.872827	92.7069
Annotation Cluster 8	Enrichment Score: 1.2821373775176208
Category	Term	Count	%	PValue	Genes	List Total	Pop Hits	Pop Total	Fold Enrichment	Bonferroni	Benjamini	FDR
UP_KEYWORDS	Synapse	5	6.84932	0.0234332	ENSMUSG00000027849, ENSMUSG00000024109, ENSMUSG00000074939, ENSMUSG00000067629, ENSMUSG00000034958	70	357	22680	4.53782	0.96208	0.335709	24.3516
UP_KEYWORDS	Cell junction	6	8.21918	0.0506938	ENSMUSG00000022091, ENSMUSG00000027849, ENSMUSG00000024109, ENSMUSG00000074939, ENSMUSG00000067629, ENSMUSG00000034958	70	661	22680	2.941	0.999238	0.424349	45.7887
GOTERM_CC_DIRECT	GO:0045202~synapse	5	6.84932	0.0784822	ENSMUSG00000027849, ENSMUSG00000024109, ENSMUSG00000074939, ENSMUSG00000067629, ENSMUSG00000034958	64	505	19662	3.04177	0.99993	0.65442	60.6997
GOTERM_CC_DIRECT	GO:0030054~cell junction	6	8.21918	0.0797797	ENSMUSG00000022091, ENSMUSG00000027849, ENSMUSG00000024109, ENSMUSG00000074939, ENSMUSG00000067629, ENSMUSG00000034958	64	718	19662	2.56729	0.99994	0.621963	61.3274
Annotation Cluster 9	Enrichment Score: 1.142205270345203
Category	Term	Count	%	PValue	Genes	List Total	Pop Hits	Pop Total	Fold Enrichment	Bonferroni	Benjamini	FDR
GOTERM_CC_DIRECT	GO:0009986~cell surface	7	9.58904	0.0152057	ENSMUSG00000050896, ENSMUSG00000024486, ENSMUSG00000031778, ENSMUSG00000036856, ENSMUSG00000024109, ENSMUSG00000002985, ENSMUSG00000000489	64	629	19662	3.41897	0.833495	0.361212	16.0614
GOTERM_MF_DIRECT	GO:0005102~receptor binding	5	6.84932	0.0479518	ENSMUSG00000050164, ENSMUSG00000036856, ENSMUSG00000024109, ENSMUSG00000002985, ENSMUSG00000000489	59	412	17446	3.58853	0.999833	0.886327	45.3148
GOTERM_CC_DIRECT	GO:0043025~neuronal cell body	3	4.10959	0.513539	ENSMUSG00000024109, ENSMUSG00000002985, ENSMUSG00000000489	64	534	19662	1.72595	1	0.981953	99.9735
Annotation Cluster 10	Enrichment Score: 1.0923965803298004
Category	Term	Count	%	PValue	Genes	List Total	Pop Hits	Pop Total	Fold Enrichment	Bonferroni	Benjamini	FDR
UP_SEQ_FEATURE	repeat:LRR 4	4	5.47945	0.0421368	ENSMUSG00000051067, ENSMUSG00000050896, ENSMUSG00000043631, ENSMUSG00000054320	62	228	18012	5.09677	0.999999	0.821294	44.0628
INTERPRO	IPR001611:Leucine-rich repeat	4	5.47945	0.0485844	ENSMUSG00000051067, ENSMUSG00000050896, ENSMUSG00000043631, ENSMUSG00000054320	66	259	20594	4.819	0.999955	0.671197	46.4608
UP_KEYWORDS	Leucine-rich repeat	4	5.47945	0.0514866	ENSMUSG00000051067, ENSMUSG00000050896, ENSMUSG00000043631, ENSMUSG00000054320	70	275	22680	4.71273	0.999321	0.36613	46.3191
UP_SEQ_FEATURE	repeat:LRR 3	4	5.47945	0.0543686	ENSMUSG00000051067, ENSMUSG00000050896, ENSMUSG00000043631, ENSMUSG00000054320	62	253	18012	4.59314	1	0.862982	52.9695
UP_SEQ_FEATURE	repeat:LRR 2	4	5.47945	0.0658176	ENSMUSG00000051067, ENSMUSG00000050896, ENSMUSG00000043631, ENSMUSG00000054320	62	274	18012	4.24111	1	0.862015	60.0983
UP_SEQ_FEATURE	repeat:LRR 1	4	5.47945	0.0658176	ENSMUSG00000051067, ENSMUSG00000050896, ENSMUSG00000043631, ENSMUSG00000054320	62	274	18012	4.24111	1	0.862015	60.0983
UP_SEQ_FEATURE	repeat:LRR 8	3	4.10959	0.0756723	ENSMUSG00000051067, ENSMUSG00000050896, ENSMUSG00000043631	62	134	18012	6.50409	1	0.855857	65.4189
UP_SEQ_FEATURE	repeat:LRR 7	3	4.10959	0.100126	ENSMUSG00000051067, ENSMUSG00000050896, ENSMUSG00000043631	62	158	18012	5.51613	1	0.894672	75.9173
INTERPRO	IPR003591:Leucine-rich repeat, typical subtype	3	4.10959	0.105631	ENSMUSG00000051067, ENSMUSG00000050896, ENSMUSG00000043631	66	175	20594	5.34909	1	0.86996	75.3501
UP_SEQ_FEATURE	repeat:LRR 6	3	4.10959	0.136701	ENSMUSG00000051067, ENSMUSG00000050896, ENSMUSG00000043631	62	191	18012	4.56308	1	0.947128	86.2428
UP_SEQ_FEATURE	repeat:LRR 5	3	4.10959	0.158927	ENSMUSG00000051067, ENSMUSG00000050896, ENSMUSG00000043631	62	210	18012	4.15023	1	0.961531	90.3245
SMART	SM00369:LRR_TYP	3	4.10959	0.180348	ENSMUSG00000051067, ENSMUSG00000050896, ENSMUSG00000043631	47	175	10425	3.80243	0.999996	0.871913	86.5603
Annotation Cluster 11	Enrichment Score: 1.0841825088522468
Category	Term	Count	%	PValue	Genes	List Total	Pop Hits	Pop Total	Fold Enrichment	Bonferroni	Benjamini	FDR
KEGG_PATHWAY	mmu05217:Basal cell carcinoma	3	4.10959	0.0156083	ENSMUSG00000000782, ENSMUSG00000036856, ENSMUSG00000020135	28	55	7720	15.039	0.610886	0.610886	14.5855
KEGG_PATHWAY	mmu04310:Wnt signaling pathway	3	4.10959	0.0864233	ENSMUSG00000000782, ENSMUSG00000036856, ENSMUSG00000020135	28	141	7720	5.86626	0.995587	0.835979	59.5797
KEGG_PATHWAY	mmu04390:Hippo signaling pathway	3	4.10959	0.0970999	ENSMUSG00000000782, ENSMUSG00000036856, ENSMUSG00000020135	28	151	7720	5.47777	0.99782	0.783929	64.0717
UP_KEYWORDS	Wnt signaling pathway	3	4.10959	0.100342	ENSMUSG00000000782, ENSMUSG00000036856, ENSMUSG00000020135	70	176	22680	5.52273	1	0.536063	71.1909
GOTERM_BP_DIRECT	GO:0016055~Wnt signaling pathway	3	4.10959	0.149155	ENSMUSG00000000782, ENSMUSG00000036856, ENSMUSG00000020135	59	213	18082	4.31654	1	0.998181	90.9186
KEGG_PATHWAY	mmu05200:Pathways in cancer	4	5.47945	0.159434	ENSMUSG00000000782, ENSMUSG00000036856, ENSMUSG00000020135, ENSMUSG00000000489	28	397	7720	2.77798	0.99997	0.823916	82.4577
Annotation Cluster 12	Enrichment Score: 0.897773036348032
Category	Term	Count	%	PValue	Genes	List Total	Pop Hits	Pop Total	Fold Enrichment	Bonferroni	Benjamini	FDR
UP_KEYWORDS	Developmental protein	7	9.58904	0.0761235	ENSMUSG00000003934, ENSMUSG00000016028, ENSMUSG00000017897, ENSMUSG00000027434, ENSMUSG00000057777, ENSMUSG00000036856, ENSMUSG00000000489	70	976	22680	2.32377	0.999982	0.455029	60.6176
GOTERM_BP_DIRECT	GO:0007275~multicellular organism development	7	9.58904	0.110797	ENSMUSG00000003934, ENSMUSG00000016028, ENSMUSG00000017897, ENSMUSG00000027434, ENSMUSG00000057777, ENSMUSG00000036856, ENSMUSG00000000489	59	1029	18082	2.08486	1	0.994712	82.5187
GOTERM_BP_DIRECT	GO:0030154~cell differentiation	5	6.84932	0.240233	ENSMUSG00000003934, ENSMUSG00000017897, ENSMUSG00000027434, ENSMUSG00000038132, ENSMUSG00000036856	59	780	18082	1.96458	1	0.999592	98.31
Annotation Cluster 13	Enrichment Score: 0.8348503865436702
Category	Term	Count	%	PValue	Genes	List Total	Pop Hits	Pop Total	Fold Enrichment	Bonferroni	Benjamini	FDR
UP_KEYWORDS	Zinc	12	16.4384	0.0513508	ENSMUSG00000019823, ENSMUSG00000024561, ENSMUSG00000037638, ENSMUSG00000032344, ENSMUSG00000037999, ENSMUSG00000044080, ENSMUSG00000028341, ENSMUSG00000001909, ENSMUSG00000036218, ENSMUSG00000002578, ENSMUSG00000025422, ENSMUSG00000041654	70	2099	22680	1.85231	0.999307	0.384296	46.2286
UP_KEYWORDS	Metal-binding	15	20.5479	0.142545	ENSMUSG00000037638, ENSMUSG00000024561, ENSMUSG00000044080, ENSMUSG00000028341, ENSMUSG00000037681, ENSMUSG00000025422, ENSMUSG00000019823, ENSMUSG00000032344, ENSMUSG00000017897, ENSMUSG00000037999, ENSMUSG00000027849, ENSMUSG00000001909, ENSMUSG00000036218, ENSMUSG00000024109, ENSMUSG00000002578	70	3395	22680	1.43152	1	0.653935	83.6338
UP_KEYWORDS	Zinc-finger	8	10.9589	0.197236	ENSMUSG00000024561, ENSMUSG00000037638, ENSMUSG00000037999, ENSMUSG00000028341, ENSMUSG00000001909, ENSMUSG00000036218, ENSMUSG00000002578, ENSMUSG00000025422	70	1565	22680	1.65623	1	0.747938	92.4651
GOTERM_MF_DIRECT	GO:0046872~metal ion binding	14	19.1781	0.317039	ENSMUSG00000037638, ENSMUSG00000024561, ENSMUSG00000044080, ENSMUSG00000028341, ENSMUSG00000037681, ENSMUSG00000025422, ENSMUSG00000019823, ENSMUSG00000032344, ENSMUSG00000017897, ENSMUSG00000037999, ENSMUSG00000027849, ENSMUSG00000001909, ENSMUSG00000024109, ENSMUSG00000002578	59	3355	17446	1.2339	1	0.996391	99.0755
Annotation Cluster 14	Enrichment Score: 0.8070450167788291
Category	Term	Count	%	PValue	Genes	List Total	Pop Hits	Pop Total	Fold Enrichment	Bonferroni	Benjamini	FDR
GOTERM_CC_DIRECT	GO:0016020~membrane	32	43.8356	0.0180342	ENSMUSG00000003934, ENSMUSG00000032936, ENSMUSG00000022454, ENSMUSG00000028364, ENSMUSG00000023143, ENSMUSG00000089774, ENSMUSG00000037681, ENSMUSG00000002985, ENSMUSG00000000489, ENSMUSG00000025422, ENSMUSG00000050896, ENSMUSG00000068735, ENSMUSG00000024486, ENSMUSG00000027849, ENSMUSG00000019970, ENSMUSG00000041654, ENSMUSG00000034796, ENSMUSG00000059588, ENSMUSG00000029189, ENSMUSG00000044288,…	64	6998	19662	1.40483	0.881075	0.29874	18.7754
UP_KEYWORDS	Cell membrane	19	26.0274	0.029666	ENSMUSG00000059588, ENSMUSG00000032936, ENSMUSG00000044288, ENSMUSG00000037681, ENSMUSG00000050164, ENSMUSG00000051497, ENSMUSG00000059213, ENSMUSG00000050896, ENSMUSG00000052353, ENSMUSG00000016028, ENSMUSG00000024486, ENSMUSG00000027849, ENSMUSG00000031778, ENSMUSG00000024109, ENSMUSG00000074939, ENSMUSG00000019970, ENSMUSG00000041654, ENSMUSG00000034796, ENSMUSG00000026527	70	3759	22680	1.63767	0.984328	0.369828	29.8426
GOTERM_CC_DIRECT	GO:0005887~integral component of plasma membrane	8	10.9589	0.0677499	ENSMUSG00000016028, ENSMUSG00000024486, ENSMUSG00000023143, ENSMUSG00000050164, ENSMUSG00000089774, ENSMUSG00000037681, ENSMUSG00000051497, ENSMUSG00000074939	64	1126	19662	2.18273	0.999728	0.690432	55.1403
UP_SEQ_FEATURE	topological domain:Extracellular	13	17.8082	0.0734197	ENSMUSG00000003934, ENSMUSG00000059588, ENSMUSG00000051067, ENSMUSG00000016028, ENSMUSG00000038400, ENSMUSG00000024486, ENSMUSG00000044288, ENSMUSG00000089774, ENSMUSG00000031778, ENSMUSG00000050164, ENSMUSG00000024109, ENSMUSG00000051497, ENSMUSG00000074939	62	2256	18012	1.67407	1	0.869117	64.2641
GOTERM_CC_DIRECT	GO:0005886~plasma membrane	22	30.137	0.0797923	ENSMUSG00000003934, ENSMUSG00000059588, ENSMUSG00000037638, ENSMUSG00000032936, ENSMUSG00000044288, ENSMUSG00000037681, ENSMUSG00000050164, ENSMUSG00000051497, ENSMUSG00000059213, ENSMUSG00000002985, ENSMUSG00000050896, ENSMUSG00000052353, ENSMUSG00000016028, ENSMUSG00000024486, ENSMUSG00000027849, ENSMUSG00000031778, ENSMUSG00000024109, ENSMUSG00000074939, ENSMUSG00000041654, ENSMUSG00000019970,…	64	4874	19662	1.38671	0.99994	0.587069	61.3334
UP_SEQ_FEATURE	topological domain:Cytoplasmic	15	20.5479	0.0986087	ENSMUSG00000059588, ENSMUSG00000003934, ENSMUSG00000044288, ENSMUSG00000023143, ENSMUSG00000050164, ENSMUSG00000089774, ENSMUSG00000051497, ENSMUSG00000051067, ENSMUSG00000038400, ENSMUSG00000016028, ENSMUSG00000024486, ENSMUSG00000027849, ENSMUSG00000031778, ENSMUSG00000024109, ENSMUSG00000074939	62	2880	18012	1.5131	1	0.906793	75.3635
UP_SEQ_FEATURE	transmembrane region	18	24.6575	0.278517	ENSMUSG00000003934, ENSMUSG00000059588, ENSMUSG00000044288, ENSMUSG00000029189, ENSMUSG00000023143, ENSMUSG00000089774, ENSMUSG00000037681, ENSMUSG00000050164, ENSMUSG00000051497, ENSMUSG00000051067, ENSMUSG00000038400, ENSMUSG00000016028, ENSMUSG00000024486, ENSMUSG00000027849, ENSMUSG00000031778, ENSMUSG00000024109, ENSMUSG00000074939, ENSMUSG00000041654	62	4312	18012	1.21273	1	0.996983	98.7787
UP_KEYWORDS	Membrane	28	38.3562	0.487888	ENSMUSG00000003934, ENSMUSG00000032936, ENSMUSG00000043631, ENSMUSG00000023143, ENSMUSG00000089774, ENSMUSG00000037681, ENSMUSG00000050896, ENSMUSG00000068735, ENSMUSG00000024486, ENSMUSG00000027849, ENSMUSG00000041654, ENSMUSG00000019970, ENSMUSG00000034796, ENSMUSG00000059588, ENSMUSG00000029189, ENSMUSG00000044288, ENSMUSG00000050164, ENSMUSG00000059213, ENSMUSG00000051497, ENSMUSG00000051067,…	70	8683	22680	1.0448	1	0.953966	99.962
UP_KEYWORDS	Transmembrane helix	20	27.3973	0.749448	ENSMUSG00000003934, ENSMUSG00000059588, ENSMUSG00000044288, ENSMUSG00000029189, ENSMUSG00000043631, ENSMUSG00000023143, ENSMUSG00000089774, ENSMUSG00000037681, ENSMUSG00000050164, ENSMUSG00000051497, ENSMUSG00000051067, ENSMUSG00000068735, ENSMUSG00000038400, ENSMUSG00000016028, ENSMUSG00000024486, ENSMUSG00000027849, ENSMUSG00000031778, ENSMUSG00000024109, ENSMUSG00000074939, ENSMUSG00000041654	70	6938	22680	0.933987	1	0.994271	100
UP_KEYWORDS	Transmembrane	20	27.3973	0.753697	ENSMUSG00000003934, ENSMUSG00000059588, ENSMUSG00000044288, ENSMUSG00000029189, ENSMUSG00000043631, ENSMUSG00000023143, ENSMUSG00000089774, ENSMUSG00000037681, ENSMUSG00000050164, ENSMUSG00000051497, ENSMUSG00000051067, ENSMUSG00000068735, ENSMUSG00000038400, ENSMUSG00000016028, ENSMUSG00000024486, ENSMUSG00000027849, ENSMUSG00000031778, ENSMUSG00000024109, ENSMUSG00000074939, ENSMUSG00000041654	70	6955	22680	0.931704	1	0.992973	100
GOTERM_CC_DIRECT	GO:0016021~integral component of membrane	20	27.3973	0.824979	ENSMUSG00000003934, ENSMUSG00000059588, ENSMUSG00000044288, ENSMUSG00000029189, ENSMUSG00000043631, ENSMUSG00000023143, ENSMUSG00000089774, ENSMUSG00000037681, ENSMUSG00000050164, ENSMUSG00000051497, ENSMUSG00000051067, ENSMUSG00000068735, ENSMUSG00000038400, ENSMUSG00000016028, ENSMUSG00000024486, ENSMUSG00000027849, ENSMUSG00000031778, ENSMUSG00000024109, ENSMUSG00000074939, ENSMUSG00000041654	64	6878	19662	0.893337	1	0.999313	100
Annotation Cluster 15	Enrichment Score: 0.5311819959157116
Category	Term	Count	%	PValue	Genes	List Total	Pop Hits	Pop Total	Fold Enrichment	Bonferroni	Benjamini	FDR
GOTERM_BP_DIRECT	GO:0000122~negative regulation of transcription from RNA polymerase II promoter	8	10.9589	0.00847771	ENSMUSG00000022091, ENSMUSG00000024561, ENSMUSG00000037638, ENSMUSG00000042589, ENSMUSG00000044080, ENSMUSG00000000782, ENSMUSG00000028341, ENSMUSG00000022658	59	729	18082	3.36323	0.995113	0.830299	11.8778
GOTERM_MF_DIRECT	GO:0043565~sequence-specific DNA binding	5	6.84932	0.158715	ENSMUSG00000042589, ENSMUSG00000027434, ENSMUSG00000000782, ENSMUSG00000028341, ENSMUSG00000002578	59	633	17446	2.33566	1	0.953065	88.0302
UP_KEYWORDS	DNA-binding	8	10.9589	0.214189	ENSMUSG00000024561, ENSMUSG00000037638, ENSMUSG00000032344, ENSMUSG00000042589, ENSMUSG00000027434, ENSMUSG00000000782, ENSMUSG00000028341, ENSMUSG00000002578	70	1604	22680	1.61596	1	0.749921	94.139
UP_KEYWORDS	Transcription regulation	8	10.9589	0.30602	ENSMUSG00000024561, ENSMUSG00000037638, ENSMUSG00000017897, ENSMUSG00000042589, ENSMUSG00000027434, ENSMUSG00000000782, ENSMUSG00000028341, ENSMUSG00000002578	70	1799	22680	1.4408	1	0.866883	98.6424
UP_KEYWORDS	Transcription	8	10.9589	0.335978	ENSMUSG00000024561, ENSMUSG00000037638, ENSMUSG00000017897, ENSMUSG00000042589, ENSMUSG00000027434, ENSMUSG00000000782, ENSMUSG00000028341, ENSMUSG00000002578	70	1859	22680	1.3943	1	0.876645	99.1923
GOTERM_BP_DIRECT	GO:0045944~positive regulation of transcription from RNA polymerase II promoter	5	6.84932	0.396822	ENSMUSG00000027434, ENSMUSG00000028341, ENSMUSG00000059213, ENSMUSG00000002578, ENSMUSG00000025422	59	995	18082	1.54007	1	0.999992	99.9451
GOTERM_BP_DIRECT	GO:0006351~transcription, DNA-templated	8	10.9589	0.401385	ENSMUSG00000024561, ENSMUSG00000037638, ENSMUSG00000017897, ENSMUSG00000042589, ENSMUSG00000027434, ENSMUSG00000000782, ENSMUSG00000028341, ENSMUSG00000002578	59	1885	18082	1.30069	1	0.999989	99.951
UP_KEYWORDS	Nucleus	16	21.9178	0.404639	ENSMUSG00000024561, ENSMUSG00000037638, ENSMUSG00000057777, ENSMUSG00000000782, ENSMUSG00000028341, ENSMUSG00000059213, ENSMUSG00000025422, ENSMUSG00000052353, ENSMUSG00000017897, ENSMUSG00000042589, ENSMUSG00000027434, ENSMUSG00000038132, ENSMUSG00000002578, ENSMUSG00000019970, ENSMUSG00000041654, ENSMUSG00000034796	70	4534	22680	1.14336	1	0.922377	99.7765
GOTERM_MF_DIRECT	GO:0003677~DNA binding	8	10.9589	0.417384	ENSMUSG00000024561, ENSMUSG00000037638, ENSMUSG00000032344, ENSMUSG00000042589, ENSMUSG00000027434, ENSMUSG00000000782, ENSMUSG00000028341, ENSMUSG00000002578	59	1847	17446	1.28076	1	0.998296	99.8687
GOTERM_MF_DIRECT	GO:0003700~transcription factor activity, sequence-specific DNA binding	4	5.47945	0.568135	ENSMUSG00000027434, ENSMUSG00000000782, ENSMUSG00000028341, ENSMUSG00000002578	59	883	17446	1.3395	1	0.999599	99.9967
UP_KEYWORDS	Activator	3	4.10959	0.569747	ENSMUSG00000017897, ENSMUSG00000027434, ENSMUSG00000000782	70	624	22680	1.55769	1	0.973671	99.9951
GOTERM_BP_DIRECT	GO:0006355~regulation of transcription, DNA-templated	8	10.9589	0.608326	ENSMUSG00000024561, ENSMUSG00000037638, ENSMUSG00000017897, ENSMUSG00000042589, ENSMUSG00000027434, ENSMUSG00000000782, ENSMUSG00000028341, ENSMUSG00000002578	59	2279	18082	1.07582	1	1	99.9999
UP_KEYWORDS	Isopeptide bond	3	4.10959	0.792226	ENSMUSG00000024561, ENSMUSG00000032344, ENSMUSG00000002578	70	953	22680	1.01994	1	0.994952	100
Annotation Cluster 16	Enrichment Score: 0.48770092888328115
Category	Term	Count	%	PValue	Genes	List Total	Pop Hits	Pop Total	Fold Enrichment	Bonferroni	Benjamini	FDR
GOTERM_BP_DIRECT	GO:0007165~signal transduction	9	12.3288	0.0459768	ENSMUSG00000059588, ENSMUSG00000016028, ENSMUSG00000044288, ENSMUSG00000037999, ENSMUSG00000050164, ENSMUSG00000036856, ENSMUSG00000024109, ENSMUSG00000074939, ENSMUSG00000067629	59	1255	18082	2.19783	1	0.947224	50.2933
GOTERM_MF_DIRECT	GO:0004871~signal transducer activity	6	8.21918	0.063682	ENSMUSG00000059588, ENSMUSG00000016028, ENSMUSG00000044288, ENSMUSG00000050164, ENSMUSG00000074939, ENSMUSG00000026527	59	648	17446	2.73792	0.999991	0.856455	55.4348
KEGG_PATHWAY	mmu04080:Neuroactive ligand-receptor interaction	4	5.47945	0.0758659	ENSMUSG00000059588, ENSMUSG00000044288, ENSMUSG00000050164, ENSMUSG00000074939	28	285	7720	3.86967	0.991208	0.906233	54.6468
GOTERM_BP_DIRECT	GO:0007166~cell surface receptor signaling pathway	3	4.10959	0.15585	ENSMUSG00000059588, ENSMUSG00000016028, ENSMUSG00000050164	59	219	18082	4.19828	1	0.998028	91.9238
GOTERM_BP_DIRECT	GO:0007186~G-protein coupled receptor signaling pathway	8	10.9589	0.305095	ENSMUSG00000059588, ENSMUSG00000016028, ENSMUSG00000044288, ENSMUSG00000050164, ENSMUSG00000031778, ENSMUSG00000002985, ENSMUSG00000074939, ENSMUSG00000026527	59	1706	18082	1.43716	1	0.999888	99.5509
UP_KEYWORDS	G-protein coupled receptor	5	6.84932	0.785911	ENSMUSG00000059588, ENSMUSG00000016028, ENSMUSG00000044288, ENSMUSG00000050164, ENSMUSG00000074939	70	1741	22680	0.9305	1	0.995096	100
UP_KEYWORDS	Transducer	5	6.84932	0.807987	ENSMUSG00000059588, ENSMUSG00000016028, ENSMUSG00000044288, ENSMUSG00000050164, ENSMUSG00000074939	70	1801	22680	0.8995	1	0.995582	100
UP_KEYWORDS	Receptor	7	9.58904	0.821163	ENSMUSG00000059588, ENSMUSG00000050896, ENSMUSG00000016028, ENSMUSG00000044288, ENSMUSG00000028341, ENSMUSG00000050164, ENSMUSG00000074939	70	2613	22680	0.867968	1	0.996011	100
GOTERM_MF_DIRECT	GO:0004930~G-protein coupled receptor activity	5	6.84932	0.846193	ENSMUSG00000059588, ENSMUSG00000016028, ENSMUSG00000044288, ENSMUSG00000050164, ENSMUSG00000074939	59	1749	17446	0.845326	1	1	100
INTERPRO	IPR000276:G protein-coupled receptor, rhodopsin-like	3	4.10959	0.949912	ENSMUSG00000044288, ENSMUSG00000050164, ENSMUSG00000074939	66	1458	20594	0.642038	1	1	100
INTERPRO	IPR017452:GPCR, rhodopsin-like, 7TM	3	4.10959	0.975412	ENSMUSG00000044288, ENSMUSG00000050164, ENSMUSG00000074939	66	1708	20594	0.548063	1	1	100
Annotation Cluster 17	Enrichment Score: 0.20106499275925457
Category	Term	Count	%	PValue	Genes	List Total	Pop Hits	Pop Total	Fold Enrichment	Bonferroni	Benjamini	FDR
GOTERM_BP_DIRECT	GO:0006811~ion transport	3	4.10959	0.563121	ENSMUSG00000089774, ENSMUSG00000051497, ENSMUSG00000041654	59	584	18082	1.57436	1	1	99.9995
UP_KEYWORDS	Ion transport	3	4.10959	0.565338	ENSMUSG00000089774, ENSMUSG00000051497, ENSMUSG00000041654	70	619	22680	1.57027	1	0.975499	99.9945
UP_KEYWORDS	Transport	6	8.21918	0.69652	ENSMUSG00000089774, ENSMUSG00000037681, ENSMUSG00000051497, ENSMUSG00000002985, ENSMUSG00000041654, ENSMUSG00000034958	70	1901	22680	1.02262	1	0.989653	99.9999
GOTERM_BP_DIRECT	GO:0006810~transport	6	8.21918	0.707776	ENSMUSG00000089774, ENSMUSG00000037681, ENSMUSG00000051497, ENSMUSG00000002985, ENSMUSG00000041654, ENSMUSG00000034958	59	1822	18082	1.00925	1	1	100
Annotation Cluster 18	Enrichment Score: 0.08441932641972236
Category	Term	Count	%	PValue	Genes	List Total	Pop Hits	Pop Total	Fold Enrichment	Bonferroni	Benjamini	FDR
GOTERM_MF_DIRECT	GO:0016740~transferase activity	5	6.84932	0.732385	ENSMUSG00000032344, ENSMUSG00000039058, ENSMUSG00000001909, ENSMUSG00000051022, ENSMUSG00000019970	59	1472	17446	1.0044	1	0.999991	100
GOTERM_MF_DIRECT	GO:0005524~ATP binding	5	6.84932	0.749498	ENSMUSG00000032344, ENSMUSG00000032936, ENSMUSG00000039058, ENSMUSG00000025422, ENSMUSG00000019970	59	1507	17446	0.981071	1	0.999991	100
UP_KEYWORDS	Transferase	5	6.84932	0.75049	ENSMUSG00000032344, ENSMUSG00000039058, ENSMUSG00000001909, ENSMUSG00000051022, ENSMUSG00000019970	70	1654	22680	0.979444	1	0.993536	100
GOTERM_MF_DIRECT	GO:0000166~nucleotide binding	5	6.84932	0.897992	ENSMUSG00000032344, ENSMUSG00000039058, ENSMUSG00000038132, ENSMUSG00000025422, ENSMUSG00000019970	59	1936	17446	0.763675	1	1	100
UP_KEYWORDS	Nucleotide-binding	4	5.47945	0.910239	ENSMUSG00000032344, ENSMUSG00000039058, ENSMUSG00000025422, ENSMUSG00000019970	70	1754	22680	0.738883	1	0.999384	100
UP_KEYWORDS	ATP-binding	3	4.10959	0.925127	ENSMUSG00000032344, ENSMUSG00000039058, ENSMUSG00000019970	70	1363	22680	0.713133	1	0.99958	100
